# Supplementary material
Source: PubMed Central journal article supplement (PMC4076090)
Supplement: supp_M048538_jlr.M048538-1.pdf [file supp_M048538_jlr.M048538-1.pdf]

Supplementary information, Figure S2

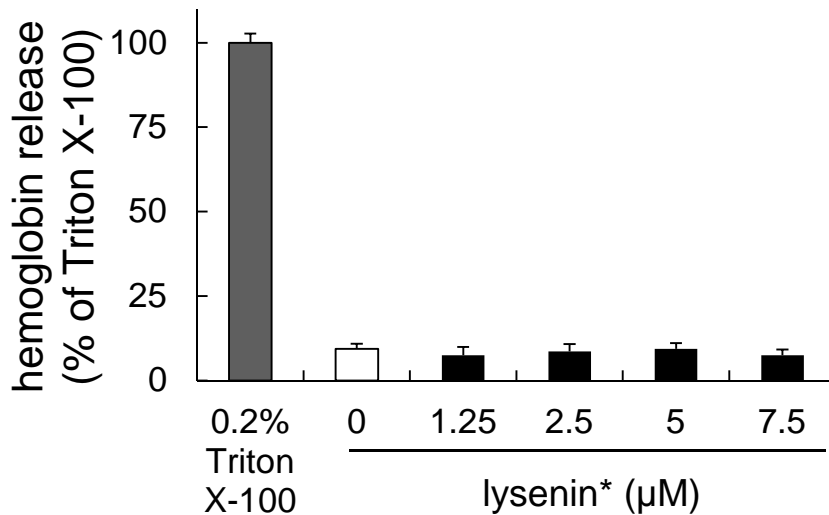

**Figure S2 Innocuity of lysenin\* for normal RBCs.** RBCs were treated in suspension with the indicated concentrations of lysenin\* at 37°C, then evaluated for toxicity (based on hemoglobin release, hemolysis upon 0.2% Triton X-100 set at 100%). Results are means  $\pm$  SEM of 3-6 samples from 2 independent experiments.

Supplementary information, Figure S3

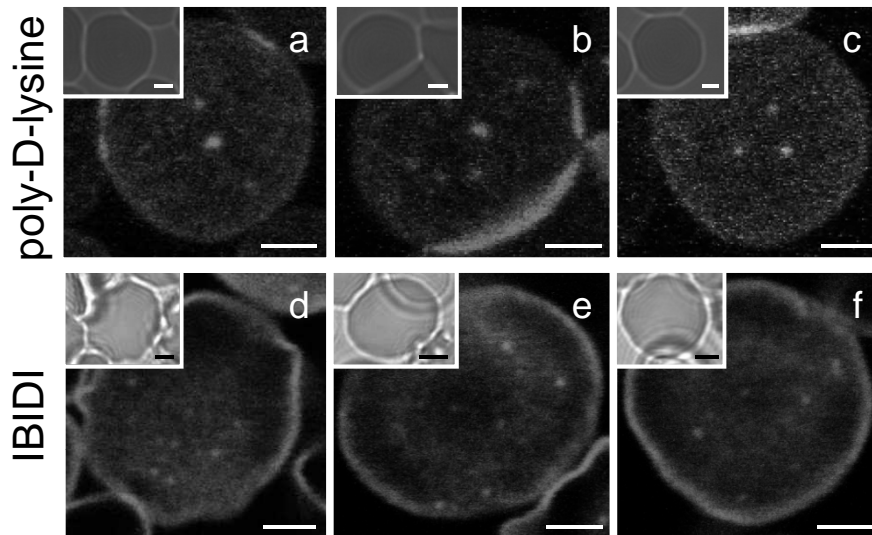

**Figure S3 Evidence for SM submicrometric domains on RBCs attached onto poly-D-lysine-coated coverslips and on barely-attached RBCs.** Erythrocytes labelled in suspension with lysenin\* were either immobilized on poly-D-lysine-coated coverslips and placed in Lab-Tek chambers (a-c; 1 experiment), or laid down on IBIDI chambers (d-f; 4 independent experiments). Scale bars, 2 $\mu$ m.

Supplementary information, Figure S4

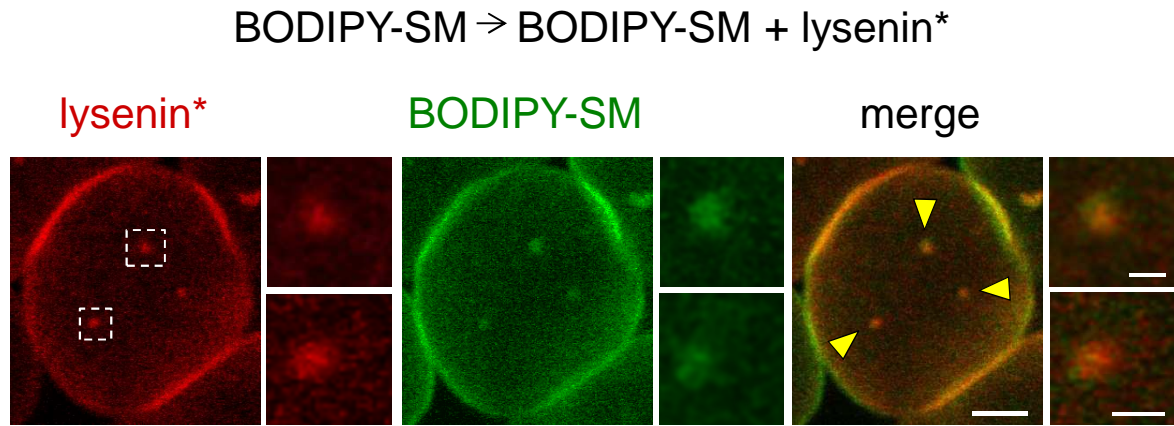

**Figure S4 Perfect co-localization between BODIPY-SM and lysenin\* domains in RBCs labelled with BODIPY-SM then with lysenin\*.** RBCs were labelled in suspension with exogenous BODIPY-SM then with lysenin\* in the presence of BODIPY-SM, before spreading onto poly-L-lysine-coated coverslips. Yellow arrowheads, domains labelled by BODIPY-SM and lysenin\*. Scale bar, 2 $\mu$ m; insets, 0.5 $\mu$ m.

Supplementary information, Figure S5

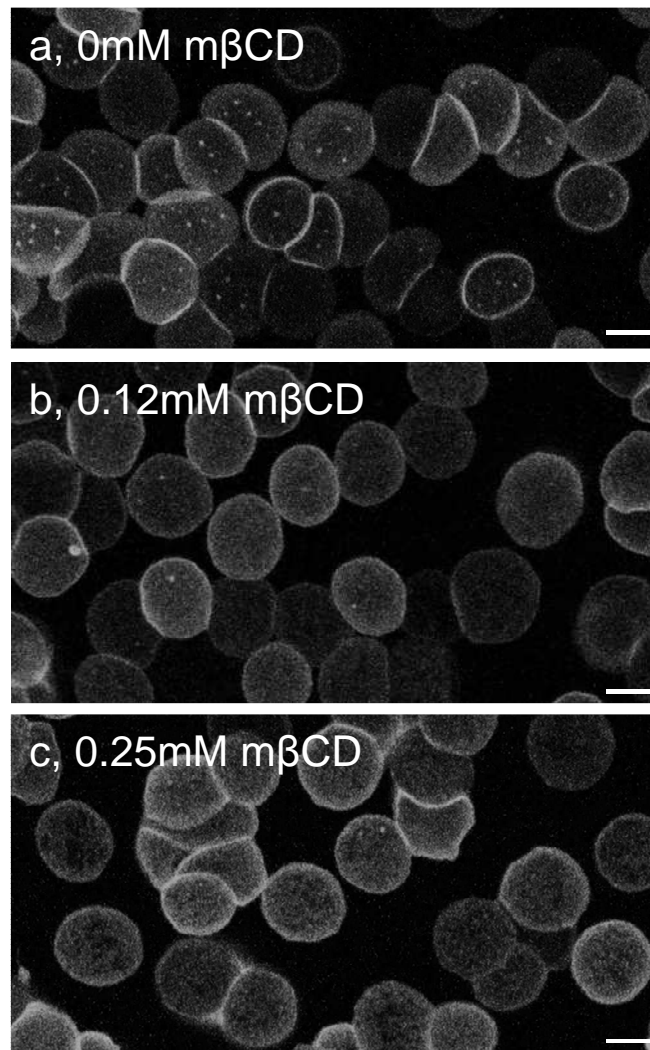

**Figure S5 Endogenous SM submicrometric domains depend on cholesterol: low magnifications of Figure 5A.** RBCs were treated in suspension with the indicated mβCD concentrations, incubated with lysenin\*, attached-spread onto poly-L-lysine-coverslips and observed by confocal microscopy using identical image acquisition settings. Representative images of 6 independent experiments. Scale bars, 5μm.

Supplementary information, Figure S6

TMA-DPH

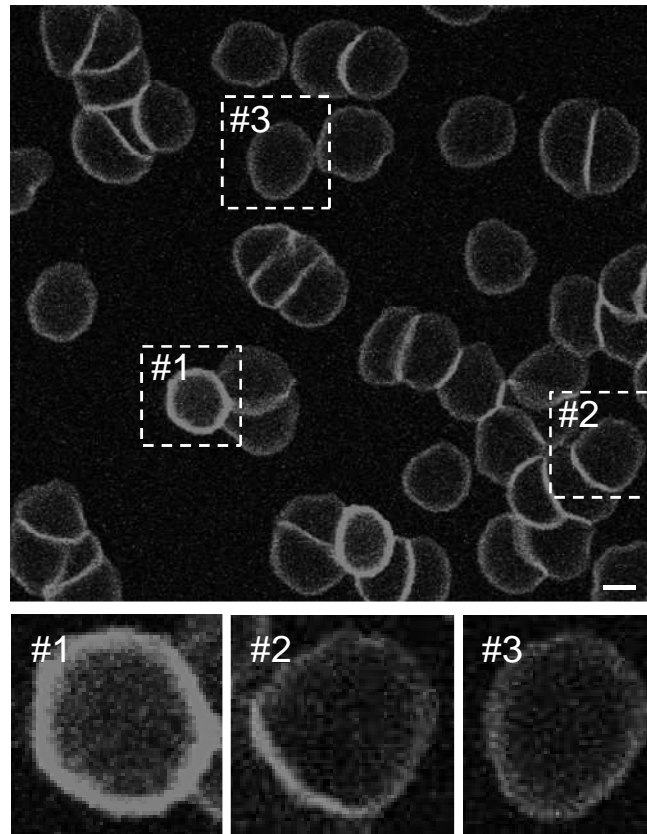

**Figure S6** Regardless of spreading stage, RBC membrane is **homogeneously labelled by TMA-DPH**. RBCs were spread onto poly-L-lysine-coated coverslips, labelled with TMA-DPH and examined by two-photon microscopy at 20°C. This led to three stages of RBC spreading (#1, #2, #3), all of which are homogeneously labelled by TMA-DPH. Scale bar, 5µm.

Supplementary information, Figure S7

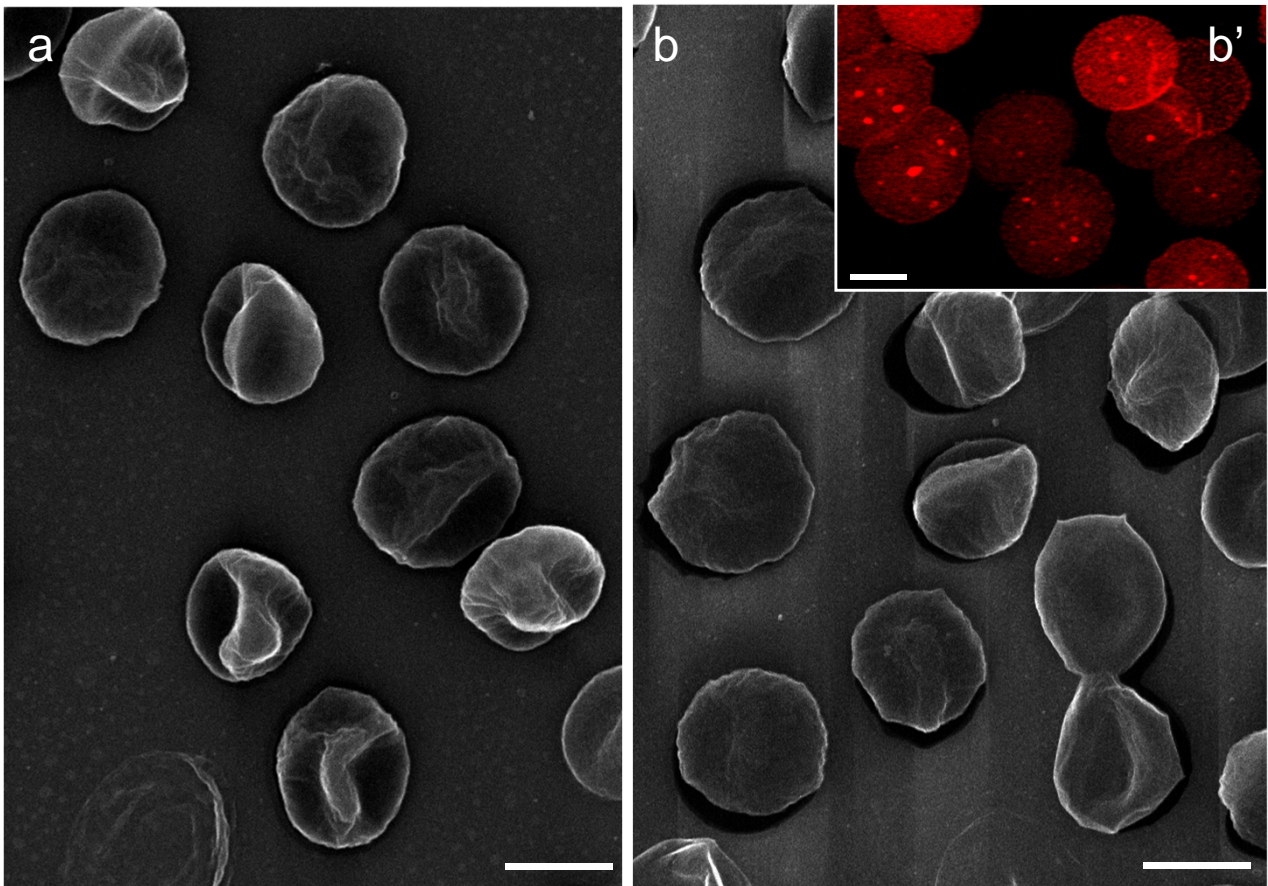

**Figure S7 Scanning electron microscopy of erythrocytes attached on poly-L-lysine and labelled or not with Lysenin\*.** RBCs were incubated (b,b') or not (a) with lysenin\* in suspension, washed, fixed with dimethylsuberimidate (DMS) and processed either for scanning electron microscopy (a,b) or for confocal microscopy (b'). Notice that fixation with DMS preserves submicrometric domains (b') and that lysenin\* labelling does not detectably alter the smooth plasma membrane (compare panels a and b). Scale bar, 5 $\mu$ m.
